# Supplementary material for: Biphasic effect of sulforaphane on angiogenesis in hypoxia via modulation of both Nrf2 and mitochondrial dynamics
Source: Royal Society of Chemistry journal article supplement (doi:10.1039/d1fo04112f), 2022-01-01
Supplement: d1fo04112f1.pdf [file d1fo04112f1.pdf]

## Original western blots for Figure 2A

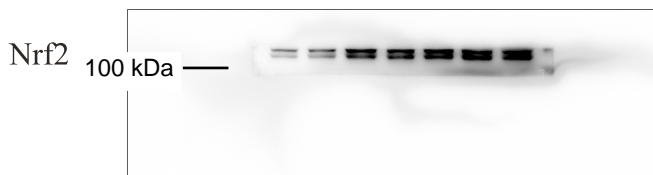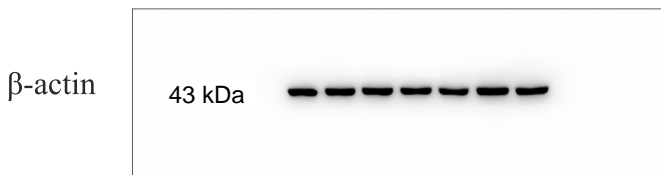

|                   |   |   |      |     |   |    |    |
|-------------------|---|---|------|-----|---|----|----|
| 1% O <sub>2</sub> | - | + | +    | +   | + | +  | +  |
| SFN ( $\mu$ M)    | - | - | 1.25 | 2.5 | 5 | 10 | 20 |

# Original western blots for Figure 2B

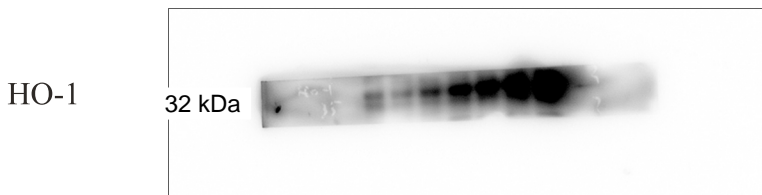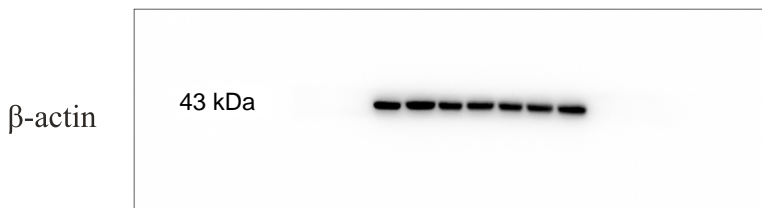

|                   |   |   |      |     |   |    |    |
|-------------------|---|---|------|-----|---|----|----|
| 1% O <sub>2</sub> | - | + | +    | +   | + | +  | +  |
| SFN ( $\mu$ M)    | - | - | 1.25 | 2.5 | 5 | 10 | 20 |

# Original western blots for Figure 2C

1% O<sub>2</sub>+siCON+SFN (μM)    1% O<sub>2</sub>+siNrf2+SFN (μM)

0   2.5   10    0   2.5   10

Nrf2

130 kDa —

100 kDa —

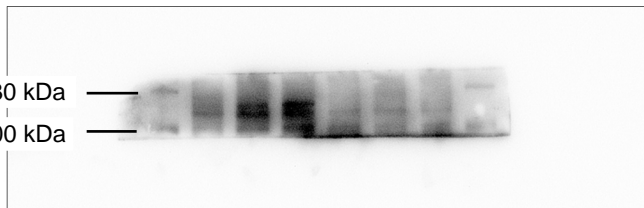

β-actin

43 kDa

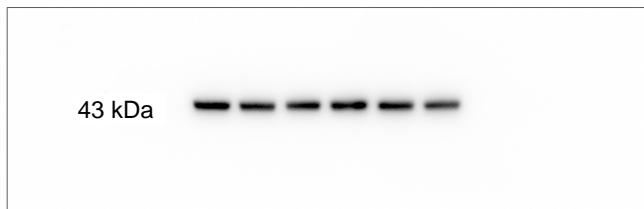

## Original western blots for Figure 2D

1% O<sub>2</sub>+siCON+SFN (μM)    1% O<sub>2</sub>+siNrf2+SFN (μM)

0   2.5   10    0   2.5   10

HO-1

32 kDa

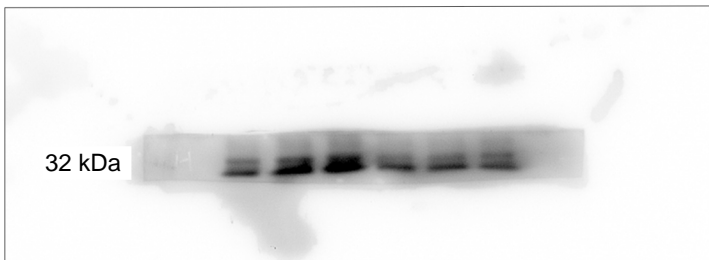

β-actin

43 kDa

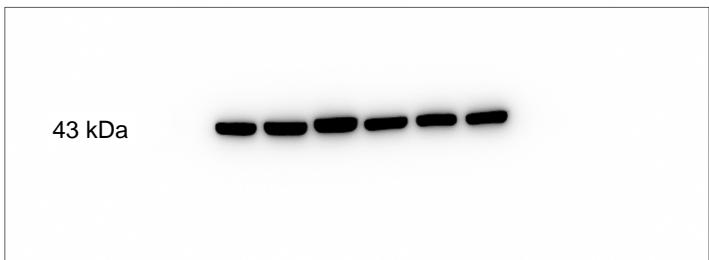



# Original western blots for Figure 4A

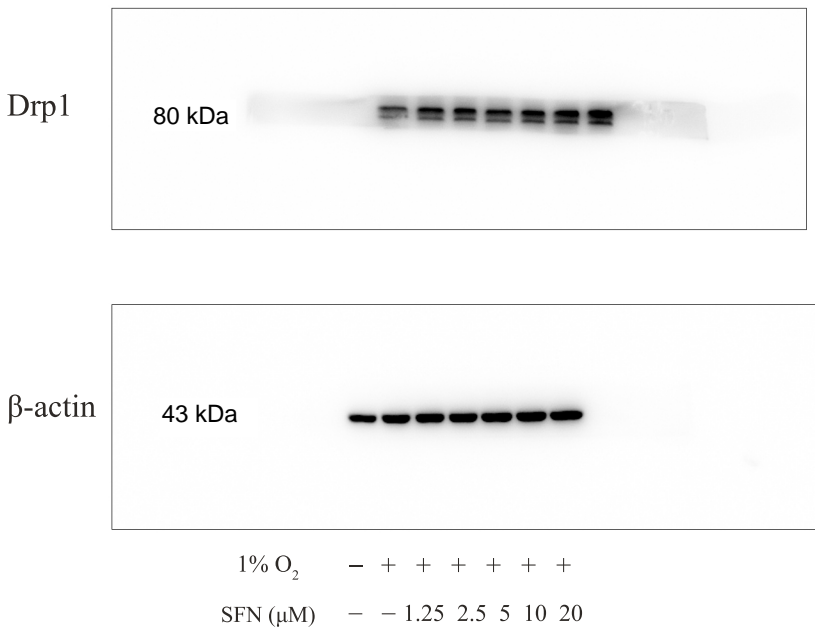

# Original western blots for Figure 4B

Fis1

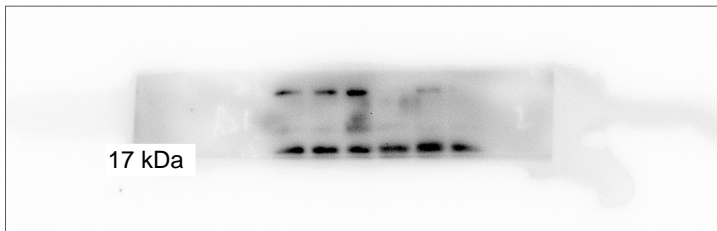

β-actin

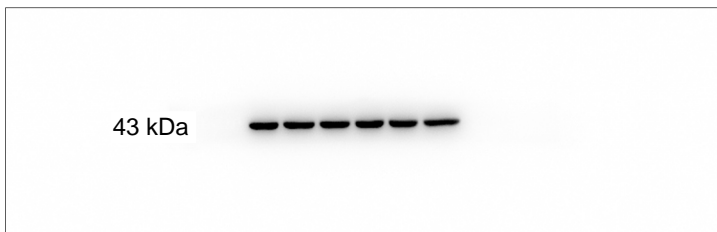

|                   |   |   |      |     |   |    |    |
|-------------------|---|---|------|-----|---|----|----|
| 1% O <sub>2</sub> | - | + | +    | +   | + | +  | +  |
| SFN (μM)          | - | - | 1.25 | 2.5 | 5 | 10 | 20 |

# Original western blots for Figure 4C

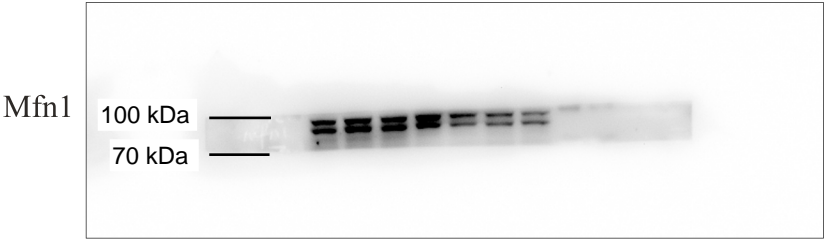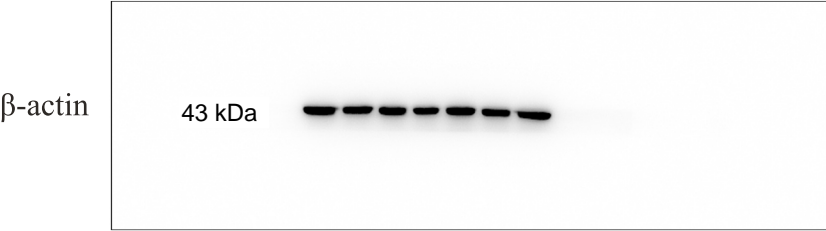

|                   |   |   |      |     |   |    |    |
|-------------------|---|---|------|-----|---|----|----|
| 1% O <sub>2</sub> | - | + | +    | +   | + | +  | +  |
| SFN ( $\mu$ M)    | - | - | 1.25 | 2.5 | 5 | 10 | 20 |

# Original western blots for Figure 4D

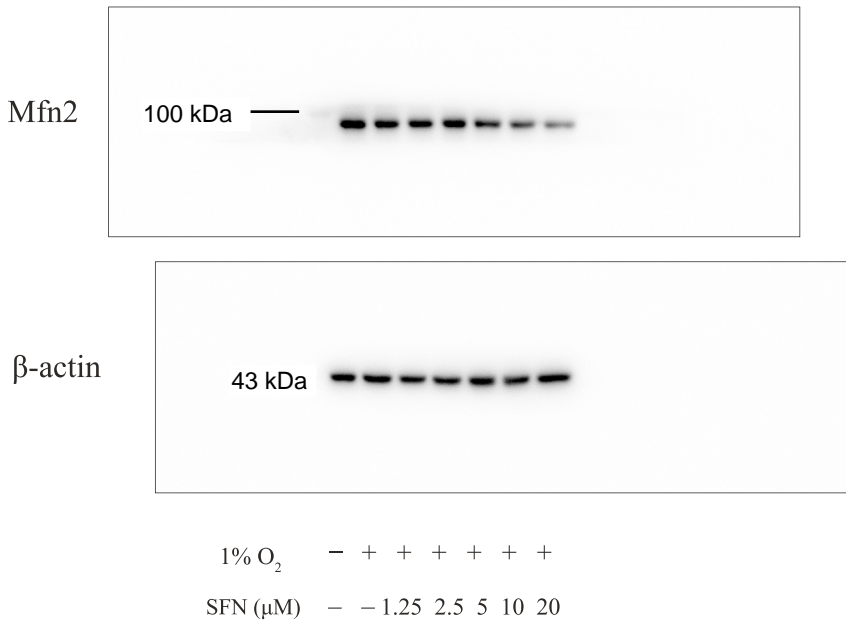

# Original western blots for Figure 4E

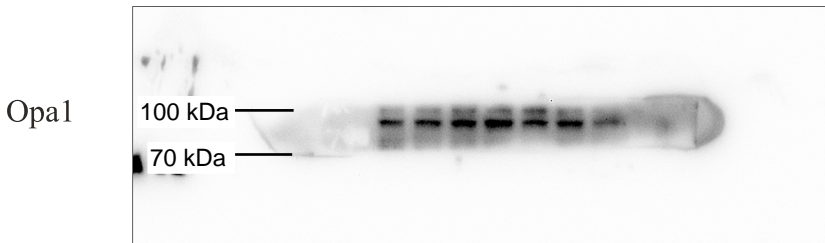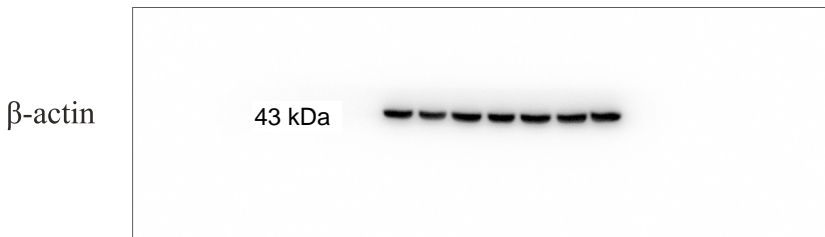

|                   |   |   |      |     |   |    |    |
|-------------------|---|---|------|-----|---|----|----|
| 1% O <sub>2</sub> | - | + | +    | +   | + | +  | +  |
| SFN ( $\mu$ M)    | - | - | 1.25 | 2.5 | 5 | 10 | 20 |
